1 **Restricted sequence variation in *Streptococcus pyogenes* penicillin binding proteins**

2

3 **Authors:**

4 Andrew Hayes<sup>a</sup>, Jake A. Lacey<sup>b</sup>, Jacqueline M. Morris<sup>a</sup>, Mark R. Davies<sup>a</sup>, Steven Y.C. Tong<sup>c,d,#</sup>

5

6 a. Department of Microbiology and Immunology, at the Peter Doherty Institute for Infection and  
7 Immunity, The University of Melbourne and The Royal Melbourne Hospital, Melbourne, Victoria,  
8 Australia

9 b. Doherty Department, The Peter Doherty Institute for Infection and Immunity, The University of  
10 Melbourne and The Royal Melbourne Hospital, Melbourne, Victoria, Australia

11 c. Victorian Infectious Disease Service, The Royal Melbourne Hospital, and Doherty Department  
12 University of Melbourne, at the Peter Doherty Institute for Infection and Immunity, Victoria,  
13 Australia

14 d. Menzies School of Health Research, Charles Darwin University, Darwin, Australia

15

16 Running head: *S. pyogenes* PBP sequence variation

17

18 # Address correspondence to Steven Tong; [Steven.Tong@mh.org.au](mailto:Steven.Tong@mh.org.au)

19

20 Abstract word count: 207

21 Main text word count: 1,236

22 **Abstract**

23 A recent clinical report has linked *Streptococcus pyogenes*  $\beta$ -lactam antibiotic resistance to  
24 mutations in the Penicillin Binding Protein PBP2x. To determine whether this is an isolated case or  
25 reflects a broader prevalence of mutations that might confer reduced  $\beta$ -lactam susceptibility, we  
26 investigated the relative frequency of penicillin binding protein (PBP) sequence variation within a  
27 global database of 9,667 *S. pyogenes* isolates. We found that mutations in *S. pyogenes* PBPs (PBP2x,  
28 PBP1a, PBP1b and PBP2a) occur infrequently across this global database with less than 3 amino acid  
29 changes differing between >99% of the global population. Only 4 of the 9,667 strains contained  
30 mutations near transpeptidase active sites. The reported PBP2x T553K substitution was not  
31 identified. These findings are in contrast to those of 2,520 *S. pneumococcus* sequences where PBP  
32 mutations are relatively frequent and are often located in key  $\beta$ -lactam binding pockets. These data,  
33 combined with the general lack of penicillin resistance reported in *S. pyogenes* worldwide, suggests  
34 that extensive, unknown, constraints restrict *S. pyogenes* PBP sequence plasticity. These findings  
35 imply that while heavy antibiotic pressure may select for mutations in the PBPs, there is currently no  
36 evidence of such mutations becoming fixed in the *S. pyogenes* population nor that mutations are  
37 being sequentially acquired in the PBPs.

38

39 **Importance**

40 Penicillin is the first line therapeutic option for *Streptococcus pyogenes* infections. Despite the global  
41 high prevalence of *S. pyogenes* infections and widespread use of penicillin, reports of resistance to  
42 penicillin have been incredibly rare. Recently, penicillin resistance was detected in two clinical *S.*  
43 *pyogenes* isolates with accompanying mutations in the active site of the penicillin binding protein  
44 PBP2x, raising concerns that penicillin resistance may become more widespread. We screened a  
45 global database of *S. pyogenes* genome sequences to investigate the frequency of penicillin binding  
46 protein (PBP) mutations, identifying that PBP mutations are uncommon relative to *Streptococcus*  
47 *pneumoniae*. These findings support clinical observations that penicillin resistance is rare in *S.*

- 48 *pyogenes*, and suggest that there are considerable constraints on *S. pyogenes* PBP sequence
- 49 variation.

## 50 INTRODUCTION

51 *Streptococcus pyogenes* (Group A *Streptococcus*, GAS) has previously been understood to be  
52 uniformly susceptible to  $\beta$ -lactam antibiotics (1). Two *S. pyogenes* isolates with elevated minimum  
53 inhibitory concentrations (MIC) to  $\beta$ -lactam antibiotics have recently been reported (2). Both isolates  
54 were molecularly typed as *emm* 43.4 and had a penicillin binding protein PBP2x missense mutation  
55 (T553K) at the transpeptidase active site which was associated with an 8-fold and 3-fold increased  
56 MIC to ampicillin and cefotaxime respectively compared to closely related isolates without the  
57 PBP2x mutation. In contrast to *S. pyogenes*, reduced susceptibility to  $\beta$ -lactams has been widely  
58 reported in *S. pneumoniae* and is strongly associated with sequence variation in PBPs (3, 4).  
59 Using GAS genome sequences from global sources, we sought to determine the prevalence of  
60 substitutions across the transpeptidase domains of the GAS PBPs (PBP2x, PBP1a, PBP2a and PBP1b)  
61 in comparison with *S. pneumoniae* (which shares PBP2x and PBP1a).

62

## 63 METHODS

64 We obtained publicly available genome sequence data for 9,667 *S. pyogenes* isolates from the short-  
65 read archive (**Supplementary Table 1**). We assembled genomes using shovill v.1.0.9  
66 (<https://github.com/tseemann/shovill>) with an underlying SKESA v.2.3.0 assembler (5). Using the  $\beta$ -  
67 lactam susceptible *S. pyogenes* serotype M3 strain ATCC BAA-595/MGAS315 as a reference, we  
68 determined the presence, amino acid sequence and alignment (6) of each of PBP2x, PBP1a, PBP1b  
69 and PBP2a in each genome with the screen\_assembly script (7) and BlastP parameters of 100%  
70 coverage and 90% identity.

71 To compare the conservation of the transpeptidase active site motifs across streptococcal species,  
72 full length PBP2x protein sequences of *S. pyogenes* serotype M3 strain ATCC BAA-595/MGAS315  
73 (NC\_004070.1), *S. pneumoniae* strain ATCC BAA-255/R6 (NC\_003098.1), *S. agalactiae* strain 2603V/R  
74 (NC\_004116.1), and the *S. dysgalactiae* subspecies *equisimilis* (SDSE) strain RE378 (NC\_018712.1)

75 reference genomes were aligned using Clustal Omega (8, 9). The percentage sequence similarity was  
76 compared using Blosum62 with threshold 1 in Geneious Prime (10).

77 To investigate the inferred crystal structure location of *S. pyogenes* PBP2x mutations relative to the  
78 *S. pneumoniae* orthologue, *S. pyogenes* PBP2x sequence variations were plotted onto the *S.*  
79 *pneumoniae* PBP2x crystal structure bound to oxacillin (PDB: 5OIZ) (11). Sequence conservation as  
80 determined by the frequency (for *S. pyogenes*) and percentage (for *S. pneumoniae*) of variant amino  
81 acids compared to the consensus was rendered onto the PBP2x crystal structure using UCSF Chimera  
82 (12).

83 We defined the PBP2x and PBP1a transpeptidase regions as that used in an assessment of 2,520  
84 invasive *S. pneumoniae* isolates by Li et al (3) and determined and plotted the number of pairwise  
85 amino acid differences within these regions using Distances Matrix in Geneious Prime (10) and  
86 ggplot2 in R version 3.6.1 (13). Similarly, we also assessed the conservation of PBP1b and PBP2a  
87 proteins for the 9,667 *S. pyogenes* genomes, and the transpeptidase region of PBP2b for *S.*  
88 *pneumoniae*.

89

## 90 **RESULTS**

91 We collated 9,667 *S. pyogenes* genome sequences, representing 115 different *emm* types and 321  
92 multi-locus sequence types (**Supplementary Table 1, Supplementary Files 1-4**). These genome  
93 sequences were mostly from datasets from the United Kingdom and United States that focused on  
94 invasive disease (14-24).

95

96 Mutations in the penicillin binding proteins (PBPs) have been associated with reduced  $\beta$ -lactam  
97 susceptibility for *S. pneumoniae* (3), *S. agalactiae* (25), *S. dysgalactiae* (26), and now *S. pyogenes* (2).  
98 A comparison of PBP2x between  $\beta$ -lactam susceptible reference genomes of *S. pyogenes*, *S.*  
99 *pneumoniae*, *S. agalactiae*, and SDSE demonstrated a high level of inter-species conservation (>72%  
100 similarity, **Supplementary Figure 1 and Supplementary Table 2**). In *S. pneumoniae*, substitutions at

101 the PBP2x transpeptidase active site (SXXK, SXN, and KSTG) result in reduced  $\beta$ -lactam susceptibility.  
102 These three motifs were conserved across the four species (**Supplementary Figure 1**).  
103 Given the similarity between PBP2x of *S. pneumoniae* and *S. pyogenes* (73.4% similarity,  
104 **Supplementary Table 1**), we mapped the conservation of residues from the alignment of 9,667 *S.*  
105 *pyogenes* PBP2x onto the crystal structure of *S. pneumoniae* PBP2x (**Figure 1**). The transpeptidase  
106 active site motifs are SXXK at positions 340-343 in *S. pyogenes* (positions 337-340 in *S. pneumoniae*),  
107 SXN at positions 399-401 in *S. pyogenes* (positions 395-397 in *S. pneumoniae*), and KSGT at positions  
108 550-553 in *S. pyogenes* (positions 547-550 in *S. pneumoniae*). There were 105 unique amino acid  
109 sequence variants of the *S. pyogenes* PBP2x sequence with no major frameshifts or premature stop  
110 codons (**Supplementary File 1**). We found no instances of the T553K substitution in the PBP2x KSGT  
111 motif as reported in the recent *S. pyogenes*  $\beta$ -lactam resistant isolates (2). Only four *S. pyogenes*  
112 isolate sequences (0.04%) had substitutions within the transpeptidase active site motifs of PBP2x  
113 (**Figure 1** and **Table 1**) corresponding to STMK to SAMK and STMK to STIK. These changes may not  
114 have a phenotypic effect on penicillin susceptibility as STIK has been recently reported in a penicillin-  
115 susceptible isolate (GASAR0057) (17). Furthermore, no amino acid substitutions were found in the  
116 active site motifs of *S. pyogenes* PBP1a. In comparison, using population data from Li et al (3), *S.*  
117 *pneumoniae* had active site motif variants in 639/2,520 (25.3%) isolates for PBP2x and 445/2,520  
118 (17.7%) for PBP1a (**Table 1**). A large proportion of *S. pneumoniae* substitutions mapped to areas near  
119 to the active site (**Supplementary Figure 2**).  
120 For *S. pneumoniae*, the number of substitutions across the whole transpeptidase domain of PBPs has  
121 been associated with penicillin resistance. Li et al. (3) found that penicillin MICs increased as the  
122 total number of divergent (defined as >10% amino acids different) transpeptidase domains of PBP2x,  
123 PBP1a and PBP2b increased from 0 to 3. For *S. pyogenes* we used the most common amino acid  
124 sequences of PBP2x and PBP1a as our reference and for *S. pneumoniae* a previously defined  
125 wildtype as the reference (3). There were considerably fewer PBP2x and PBP1a transpeptidase  
126 domains with multiple substitutions for *S. pyogenes* compared to *S. pneumoniae* (**Figure 2**). No *S.*

127 *pyogenes* strains had sufficient mutations to reach the 10% threshold. For *S. pneumoniae*, 18.3%  
128 (462 of 2,520 strains) and 19.2% (485 of 2,520 strains) contained divergent PBP2x and PBP1a  
129 transpeptidase domains respectively (**Figure 2**). This pattern of greater conservation of *S. pyogenes*  
130 PBPs was also observed for PBP1b and PBP2a in *S. pyogenes* compared to PBP2b in *S. pneumoniae*  
131 (**Supplementary Figure 3**).

132

### 133 **DISCUSSION**

134 We found no evidence that mutations are present in the  $\beta$ -lactam binding site KSGTAQ motif of  
135 PBP2x among 9,667 *S. pyogenes* genome sequences. Only four isolates contained mutations in the  
136 transpeptidase active sites of PBP2x and PBP1a. Although the report of two *S. pyogenes* isolates with  
137 reduced  $\beta$ -lactam susceptibility associated with *pbp2x* mutations is concerning (2), our findings  
138 provide reassurance that these are extremely limited, and perhaps unique, occurrences at this stage.  
139 We found a high degree of conservation of GAS PBP2x and PBP1a at transpeptidase active sites and  
140 across the broader transpeptidase domains. In comparison, PBP2x and PBP1a for *S. pneumoniae*  
141 were far less conserved, suggesting that there are strong evolutionary constraints in these domains  
142 for *S. pyogenes* that is not the case for *S. pneumoniae*. Studies of penicillin-resistant *S. pyogenes*  
143 generated through mutagenesis (27) or serial passage in penicillin containing medium (28),  
144 demonstrated that mutants with raised penicillin MICs appeared to have alterations in PBPs with  
145 reduced penicillin affinity (27). Notably mutants grow more slowly, have aberrant colony  
146 morphology compared to wild type strains (27), and are avirulent with a decrease in M protein  
147 production (28). These laboratory experiments, together with the absence of naturally occurring  
148 isolates with greater than five amino acid substitutions in PBP2x or PBP1a, strongly suggest that  
149 changes to the PBPs are associated with a significant fitness cost.

150

### 151 **ACKNOWLEDGEMENTS**

152 This work was supported by an Australian National Health and Medical Research Council (NHMRC)  
153 project grant #1098319. SYCT is a NHMRC Career Development Fellow (#1145033). MRD is the  
154 recipient of a University of Melbourne C. R. Roper Fellowship. The funders had no role in study  
155 design, data collection and interpretation, or the decision to submit the work for publication.



156 **References**

- 157 1. **Horn DL, Zabriskie JB, Austrian R, Cleary PP, Ferretti JJ, Fischetti VA, Gotschlich E, Kaplan**  
158 **EL, McCarty M, Opal SM, Roberts RB, Tomasz A, Wachtfogel Y.** 1998. Why have group A  
159 streptococci remained susceptible to penicillin? Report on a symposium. *Clin Infect Dis*  
160 **26:1341-1345.**
- 161 2. **Vannice K, Ricaldi J, Nanduri S, Fang FC, Lynch J, Bryson-Cahn C, Wright T, Duchin J, Kay M,**  
162 **Chochua S, Van Beneden C, Beall B.** 2019. *Streptococcus pyogenes* *pbp2x* Mutation Confers  
163 Reduced Susceptibility to beta-lactam antibiotics. *Clin Infect Dis* doi:10.1093/cid/ciz1000.
- 164 3. **Li Y, Metcalf BJ, Chochua S, Li Z, Gertz RE, Jr., Walker H, Hawkins PA, Tran T, Whitney CG,**  
165 **McGee L, Beall BW.** 2016. Penicillin-Binding Protein Transpeptidase Signatures for Tracking  
166 and Predicting beta-Lactam Resistance Levels in *Streptococcus pneumoniae*. *MBio* **7.**
- 167 4. **Dewe TCM, D'Aeth JC, Croucher NJ.** 2019. Genomic epidemiology of penicillin-non-  
168 susceptible *Streptococcus pneumoniae*. *Microb Genom* **5.**
- 169 5. **Souvorov A, Agarwala R, Lipman DJ.** 2018. SKESA: strategic k-mer extension for scrupulous  
170 assemblies. *Genome Biol* **19:153.**
- 171 6. **Edgar RC.** 2004. MUSCLE: multiple sequence alignment with high accuracy and high  
172 throughput. *Nucleic Acids Res* **32:1792-1797.**
- 173 7. **Davies MR, McIntyre L, Mutreja A, Lacey JA, Lees JA, Towers RJ, Duchene S, Smeesters PR,**  
174 **Frost HR, Price DJ, Holden MTG, David S, Giffard PM, Worthing KA, Seale AC, Berkley JA,**  
175 **Harris SR, Rivera-Hernandez T, Berking O, Cork AJ, Torres R, Lithgow T, Strugnell RA,**  
176 **Bergmann R, Nitsche-Schmitz P, Chhatwal GS, Bentley SD, Fraser JD, Moreland NJ,**  
177 **Carapetis JR, Steer AC, Parkhill J, Saul A, Williamson DA, Currie BJ, Tong SYC, Dougan G,**  
178 **Walker MJ.** 2019. Atlas of group A streptococcal vaccine candidates compiled using large-  
179 scale comparative genomics. *Nat Genet* **51:1035-1043.**

- 180 8. **Sievers F, Wilm A, Dineen D, Gibson TJ, Karplus K, Li W, Lopez R, McWilliam H, Remmert**  
181 **M, Soding J, Thompson JD, Higgins DG.** 2011. Fast, scalable generation of high-quality  
182 protein multiple sequence alignments using Clustal Omega. *Mol Syst Biol* **7**:539.
- 183 9. **Goujon M, McWilliam H, Li W, Valentin F, Squizzato S, Paern J, Lopez R.** 2010. A new  
184 bioinformatics analysis tools framework at EMBL-EBI. *Nucleic Acids Res* **38**:W695-699.
- 185 10. **Kearse M, Moir R, Wilson A, Stones-Havas S, Cheung M, Sturrock S, Buxton S, Cooper A,**  
186 **Markowitz S, Duran C, Thierer T, Ashton B, Meintjes P, Drummond A.** 2012. Geneious  
187 Basic: an integrated and extendable desktop software platform for the organization and  
188 analysis of sequence data. *Bioinformatics* **28**:1647-1649.
- 189 11. **Bernardo-Garcia N, Mahasenan KV, Batuecas MT, Lee M, Hesek D, Petrackova D,**  
190 **Doubrovova L, Branny P, Mobashery S, Hermoso JA.** 2018. Allostery, Recognition of Nascent  
191 Peptidoglycan, and Cross-linking of the Cell Wall by the Essential Penicillin-Binding Protein 2x  
192 of *Streptococcus pneumoniae*. *ACS Chem Biol* **13**:694-702.
- 193 12. **Pettersen EF, Goddard TD, Huang CC, Couch GS, Greenblatt DM, Meng EC, Ferrin TE.** 2004.  
194 UCSF Chimera--a visualization system for exploratory research and analysis. *J Comput Chem*  
195 **25**:1605-1612.
- 196 13. **R Core Team.** 2019. R: A language and environment for statistical computing. R Foundation  
197 for Statistical Computing, Vienna, Austria. URL <http://www.R-project.org/>.
- 198 14. **Athey TB, Teatero S, Sieswerda LE, Gubbay JB, Marchand-Austin A, Li A, Wasserscheid J,**  
199 **Dewar K, McGeer A, Williams D, Fittipaldi N.** 2016. High Incidence of Invasive Group A  
200 *Streptococcus* Disease Caused by Strains of Uncommon emm Types in Thunder Bay, Ontario,  
201 Canada. *J Clin Microbiol* **54**:83-92.
- 202 15. **Chalker V, Jironkin A, Coelho J, Al-Shahib A, Platt S, Kapatai G, Daniel R, Dhami C,**  
203 **Laranjeira M, Chambers T, Guy R, Lamagni T, Harrison T, Chand M, Johnson AP,**  
204 **Underwood A, Scarlet Fever Incident Management T.** 2017. Genome analysis following a  
205 national increase in Scarlet Fever in England 2014. *BMC Genomics* **18**:224.

- 206 16. **Bergin SM, Periaswamy B, Barkham T, Chua HC, Mok YM, Fung DSS, Su AHC, Lee YL, Chua**  
207 **MLI, Ng PY, Soon WJW, Chu CW, Tan SL, Meehan M, Ang BSP, Leo YS, Holden MTG, De P,**  
208 **Hsu LY, Chen SL, de Sessions PF, Marimuthu K.** 2018. An Outbreak of *Streptococcus*  
209 *pyogenes* in a Mental Health Facility: Advantage of Well-Timed Whole-Genome Sequencing  
210 Over emm Typing. *Infect Control Hosp Epidemiol* **39**:852-860.
- 211 17. **Turner CE, Bedford L, Brown NM, Judge K, Torok ME, Parkhill J, Peacock SJ.** 2017.  
212 Community outbreaks of group A *Streptococcus* revealed by genome sequencing. *Sci Rep*  
213 **7**:8554.
- 214 18. **Coelho JM, Kapatai G, Jironkin A, Al-Shahib A, Daniel R, Dhimi C, Laranjeira AM, Chambers**  
215 **T, Phillips S, Tewolde R, Underwood A, Chalker VJ.** 2019. Genomic sequence investigation  
216 *Streptococcus pyogenes* clusters in England (2010-2015). *Clin Microbiol Infect* **25**:96-101.
- 217 19. **Dickinson H, Reacher M, Nazareth B, Eagle H, Fowler D, Underwood A, Chand M, Chalker**  
218 **V, Coelho J, Daniel R, Kapatai G, Al-Shahib A, Puleston R.** 2019. Whole-genome sequencing  
219 in the investigation of recurrent invasive group A *streptococcus* outbreaks in a maternity  
220 unit. *J Hosp Infect* **101**:320-326.
- 221 20. **Davies MR, Holden MT, Coupland P, Chen JH, Venturini C, Barnett TC, Zakour NL, Tse H,**  
222 **Dougan G, Yuen KY, Walker MJ.** 2015. Emergence of scarlet fever *Streptococcus pyogenes*  
223 emm12 clones in Hong Kong is associated with toxin acquisition and multidrug resistance.  
224 *Nat Genet* **47**:84-87.
- 225 21. **Ben Zakour NL, Davies MR, You Y, Chen JH, Forde BM, Stanton-Cook M, Yang R, Cui Y,**  
226 **Barnett TC, Venturini C, Ong CL, Tse H, Dougan G, Zhang J, Yuen KY, Beatson SA, Walker**  
227 **MJ.** 2015. Transfer of scarlet fever-associated elements into the group A *Streptococcus*  
228 M1T1 clone. *Sci Rep* **5**:15877.
- 229 22. **Chochua S, Metcalf BJ, Li Z, Rivers J, Mathis S, Jackson D, Gertz RE, Jr., Srinivasan V,**  
230 **Lynfield R, Van Beneden C, McGee L, Beall B.** 2017. Population and Whole Genome

- 231 Sequence Based Characterization of Invasive Group A Streptococci Recovered in the United  
232 States during 2015. *MBio* **8**.
- 233 23. **Kapatai G, Coelho J, Platt S, Chalker VJ.** 2017. Whole genome sequencing of group A  
234 *Streptococcus*: development and evaluation of an automated pipeline for emm gene typing.  
235 *PeerJ* **5**:e3226.
- 236 24. **Lynskey NN, Jauneikaite E, Li HK, Zhi X, Turner CE, Mosavie M, Pearson M, Asai M,**  
237 **Lobkowitz L, Chow JY, Parkhill J, Lamagni T, Chalker VJ, Sriskandan S.** 2019. Emergence of  
238 dominant toxigenic M1T1 *Streptococcus pyogenes* clone during increased scarlet fever  
239 activity in England: a population-based molecular epidemiological study. *Lancet Infect Dis*  
240 **19**:1209-1218.
- 241 25. **Dahesh S, Hensler ME, Van Sorge NM, Gertz RE, Jr., Schrag S, Nizet V, Beall BW.** 2008. Point  
242 mutation in the group B streptococcal *pbp2x* gene conferring decreased susceptibility to  
243 beta-lactam antibiotics. *Antimicrob Agents Chemother* **52**:2915-2918.
- 244 26. **Fuursted K, Stegger M, Hoffmann S, Lambertsen L, Andersen PS, Deleuran M, Thomsen**  
245 **MK.** 2016. Description and characterization of a penicillin-resistant *Streptococcus*  
246 *dysgalactiae* subsp. *equisimilis* clone isolated from blood in three epidemiologically linked  
247 patients. *J Antimicrob Chemother* **71**:3376-3380.
- 248 27. **Gutmann L, Tomasz A.** 1982. Penicillin-resistant and penicillin-tolerant mutants of group A  
249 Streptococci. *Antimicrob Agents Chemother* **22**:128-136.
- 250 28. **Rosendal K.** 1958. Investigations of Penicillin-Resistant Streptococci belonging to Group A.  
251 *Acta Pathol et Microbiol Scand* **42**:181-188.
- 252
- 253

254 **Table 1:** Percentage of transpeptidase sequences with variation in the SXXK, SXN or K(T/S)G motifs  
 255 of the transpeptidase active sites in PBP1a and PBP2x for *S. pneumoniae* and *S. pyogenes*.  
 256

|                     | <i>S. pneumoniae</i> | <i>S. pyogenes</i> |
|---------------------|----------------------|--------------------|
| Motif               | (n=2,520)            | (n=9,667)          |
|                     | Variants (%)         | Variants (%)       |
| <b><u>PBP1a</u></b> |                      |                    |
| STMK*               | 445 (17.7)           | 0 (0)              |
| SRN                 | 0 (0)                | 0 (0)              |
| KTG(T)              | 0 (0)                | 0 (0)              |
| <b><u>PBP2x</u></b> |                      |                    |
| STMK*               | 639 (25.3)           | 4 (0.04)           |
| SSN                 | 0 (0)                | 0 (0)              |
| KSG(T)**            | 0 (3) (0 (0.1))      | 0 (0)              |

257

258 \* the transpeptidase domain sequences as defined in Li et al 2016 were truncated between the S  
 259 and T of the S//TMK

260 \*\* This table does not include the two T553K sequences reported to be associated with  $\beta$ -lactam  
 261 resistance in *S. pyogenes* in Vannice et al.

262 **Figure 1: Global amino acid variation of *Streptococcus pyogenes* PBP2x mapped against the crystal**  
263 **structure of *Streptococcus pneumoniae* PBP2x**

264

265 Crystal structure of PBP2X from *S. pneumoniae* bound to oxacillin (Blue) with residue conservation of  
266 *S. pyogenes* PBP2x mapped to surface. 9,667 *S. pyogenes* sequences were mapped to the 5OIZ  
267 structure sequence and frequency of conservation amongst *S. pyogenes* strains determined.  
268 Conservation was then mapped to surface residues and colour gradient applied. Black residues  
269 represent regions absent in the alignment due to absence of sequence relative to the *S. pneumoniae*  
270 crystal structure. Thresholds were chosen to represent differing orders of magnitude for  
271 conservation with thresholds set at orders of magnitude (0, 1, 10, 100, 1000 sequences varying at  
272 the residue). **Inset:** ribbon diagram of binding pocket motifs SSN, STMK and KSG with position of  
273 mutated residue (T553K) highlighted (yellow). Mutations were observed in the STMK motif in 4 of  
274 the 9,667 sequences.

275 **Figure 2: Amino acid differences of the transpeptidase domains of PBP2x and PBP1a**

276

277 The percentage of isolates with changes in the transpeptidase domains of A) PBP2x and B) PBP1a,

278 relative to penicillin susceptible references in *Streptococcus pneumoniae* (blue, n= 2,520) and *S.*

279 *pyogenes* (red, n= 9,667). Sequences that are >10% divergent (indicated by dotted vertical lines)

280 have been associated with increased penicillin minimum inhibitory concentrations in *S. pneumoniae*.

281 **Supplementary Table 1:** Strain list with *emm* and MLST types, amino acid sequence and alleles of  
282 PBP2x, PBP1a, PBP1b and PBP2a.  
283  
284 **Supplementary Table 2:** The similarity matrix between PBP2x for four *Streptococcus* species as  
285 determined by BLOSUM62 threshold  $\geq 1$ .



286 **Supplementary Figure 1: PBP2x alignment for *S. pyogenes*, *S. pneumoniae*, *S. agalactiae*, and *S.***

287 ***dysgalactiae subspecies equisimilis***

288 Clustal Omega multiple sequence alignment of PBP2x between of *S. pyogenes* serotype M3 strain

289 ATCC BAA-595/MGAS315 (genome reference NC\_004070.1, protein reference WP\_011106648.1), *S.*

290 *pneumoniae* strain ATCC BAA-255/R6 (genome reference NC\_003098.1, protein reference

291 NP\_357898.1), *S. agalactiae* strain 2603V/R (genome reference NC\_004116.1, protein reference

292 NP\_687322.1), and the *S. dysgalactiae subspecies equisimilis* (labelled *S. equisimilis*) strain RE378

293 (genome reference NC\_018712.1, protein reference WP\_015017311.1). The three transpeptidase

294 active site motifs are highlighted in bold text and underlined. Fully conserved amino acids are

295 denoted by an asterix, a strongly conserved protein is denoted by a colon and proteins that are

296 weakly conserved are denoted by a full-stop.

297 **Supplementary Figure 2: *Streptococcus pneumoniae* transpeptidase domain sequences mapped to**  
298 **the crystal structure of PBP2x**

299 Crystal structure of PBP2X from *S. pneumoniae* bound to oxacillin (Blue) with residue conservation of  
300 the 118 transpeptidase variants identified by Li et al (2016) mapped to surface. The 118 non-  
301 redundant transpeptidase sequences identified by Li et al (2016) were aligned using MUSCLE aligner  
302 and the conservation of sites mapped to the surface of PDB 5OIZ and colour gradient applied. Black  
303 residues represent regions absent in the alignment due to not being part of the transpeptidase  
304 domain. Thresholds were chosen to represent the range of sequence variation in the unique  
305 sequences but unlike the *S. pyogenes* dataset does not represent frequency of the variants within  
306 the population. **Inset:** ribbon diagram of binding pocket motifs SSN, STMK and KSG with position of  
307 mutated residue (T550K) highlighted.

308 **Supplementary Figure 3:** Amino acid differences of the complete PBP1b and PBP2a for *S. pyogenes*  
309 and the transpeptidase domain of PBP2b for *S. pneumoniae*. The length of the complete PBP1b was  
310 766 amino acids and PBP2a was 756 amino acids for *S. pyogenes*. The PBP2b transpeptidase domain  
311 was 280 amino acids in *S. pneumoniae*. The percentage of isolates with changes relative to penicillin  
312 susceptible references in the full protein of *S. pyogenes* (red; n= 9,667) and in the transpeptidase  
313 domains of *S. pneumoniae* (blue; n=2,520). For A) PBP1b (*S. pyogenes*), B) PBP2a (*S. pyogenes*) and  
314 C) PBP2b (*S. pneumoniae*). Sequences that are >10% divergent are indicated by dotted vertical lines.

variants

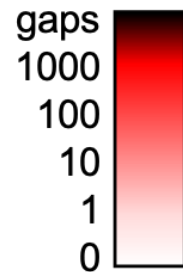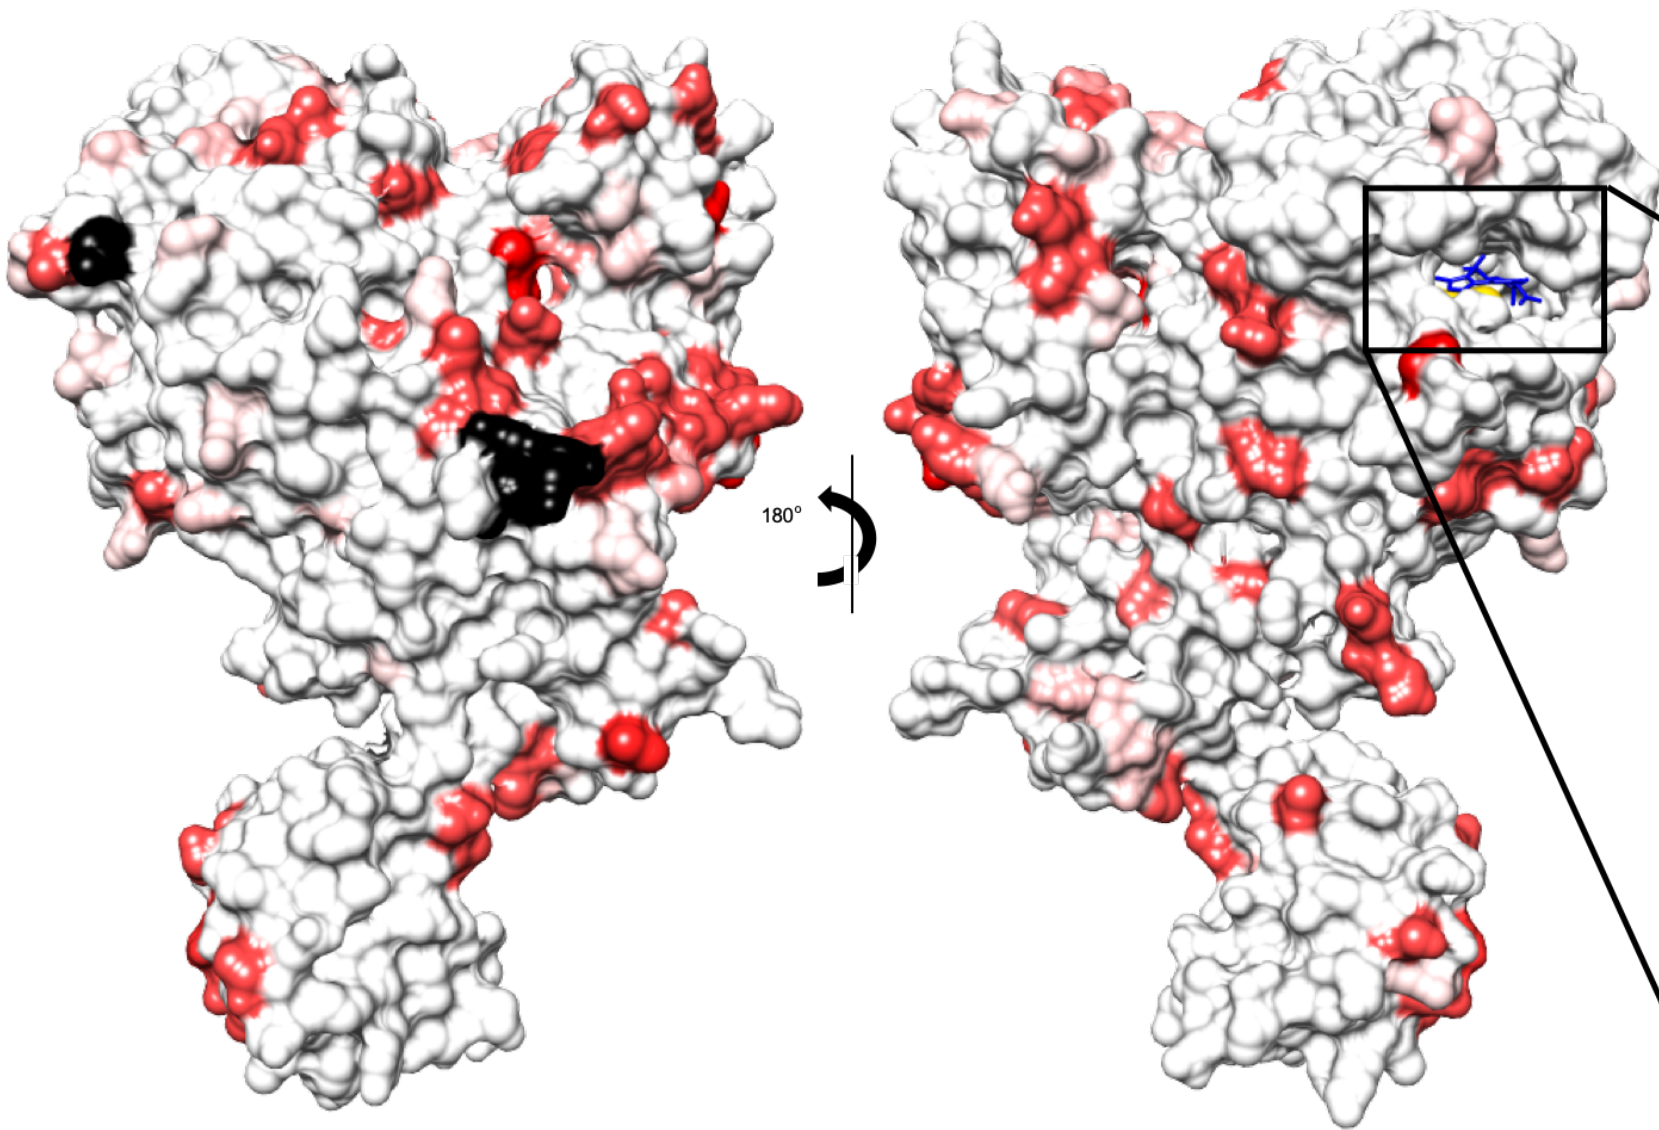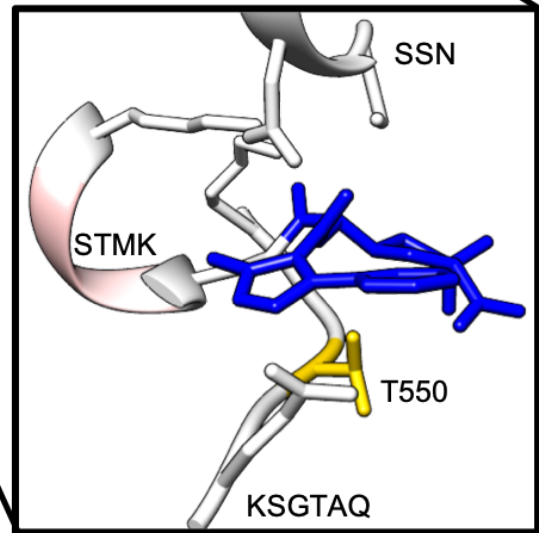

A

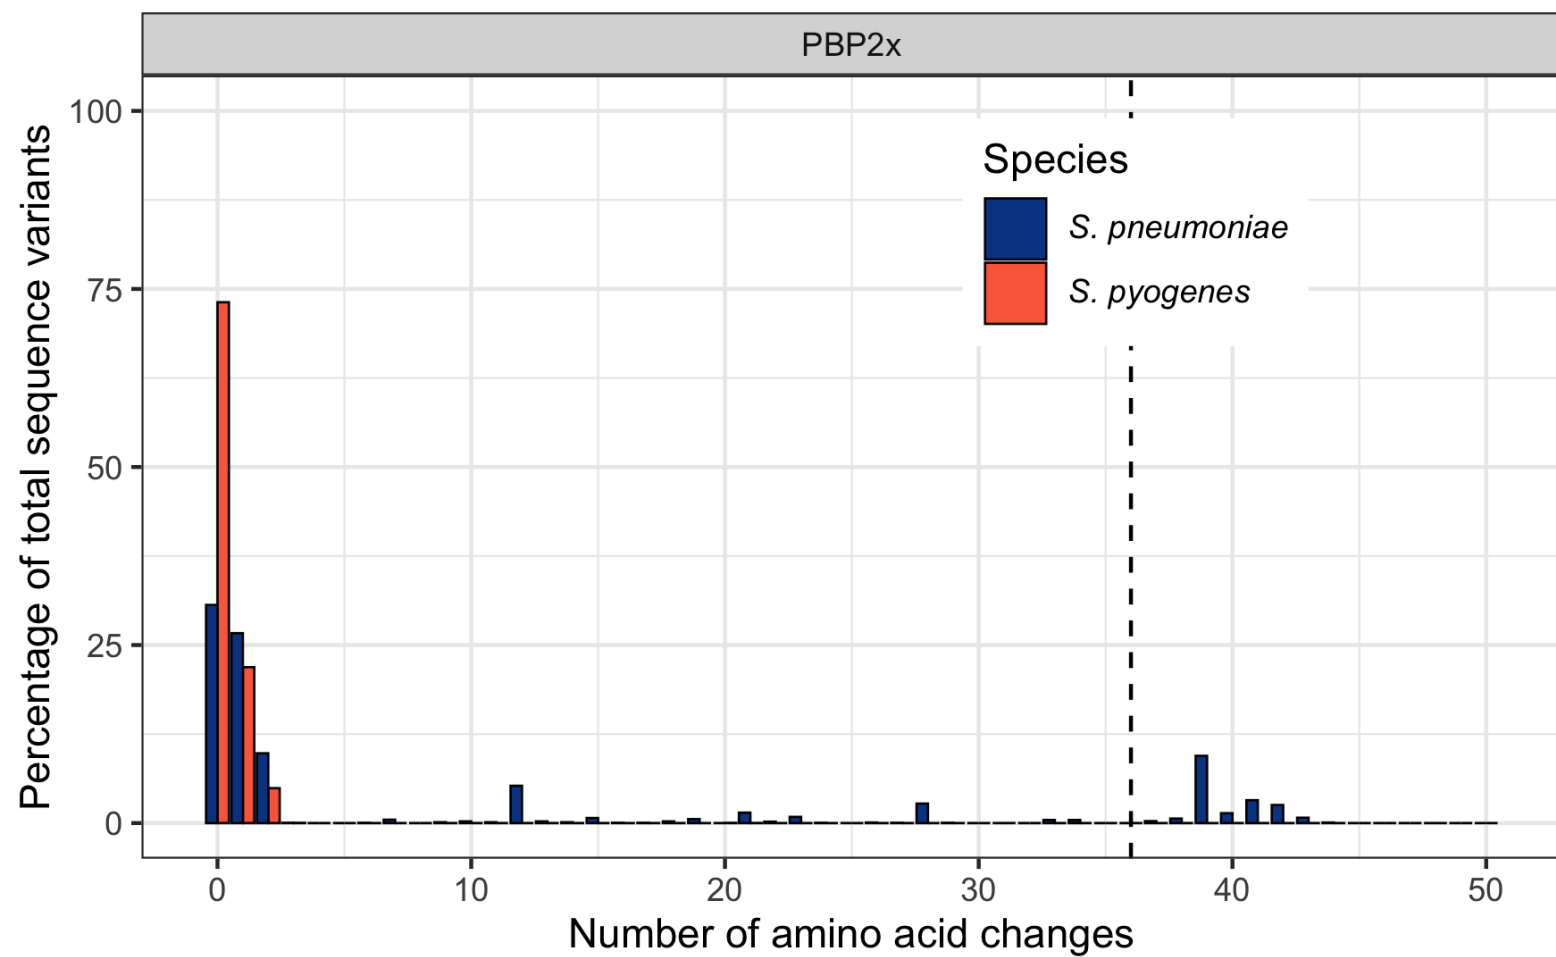

B

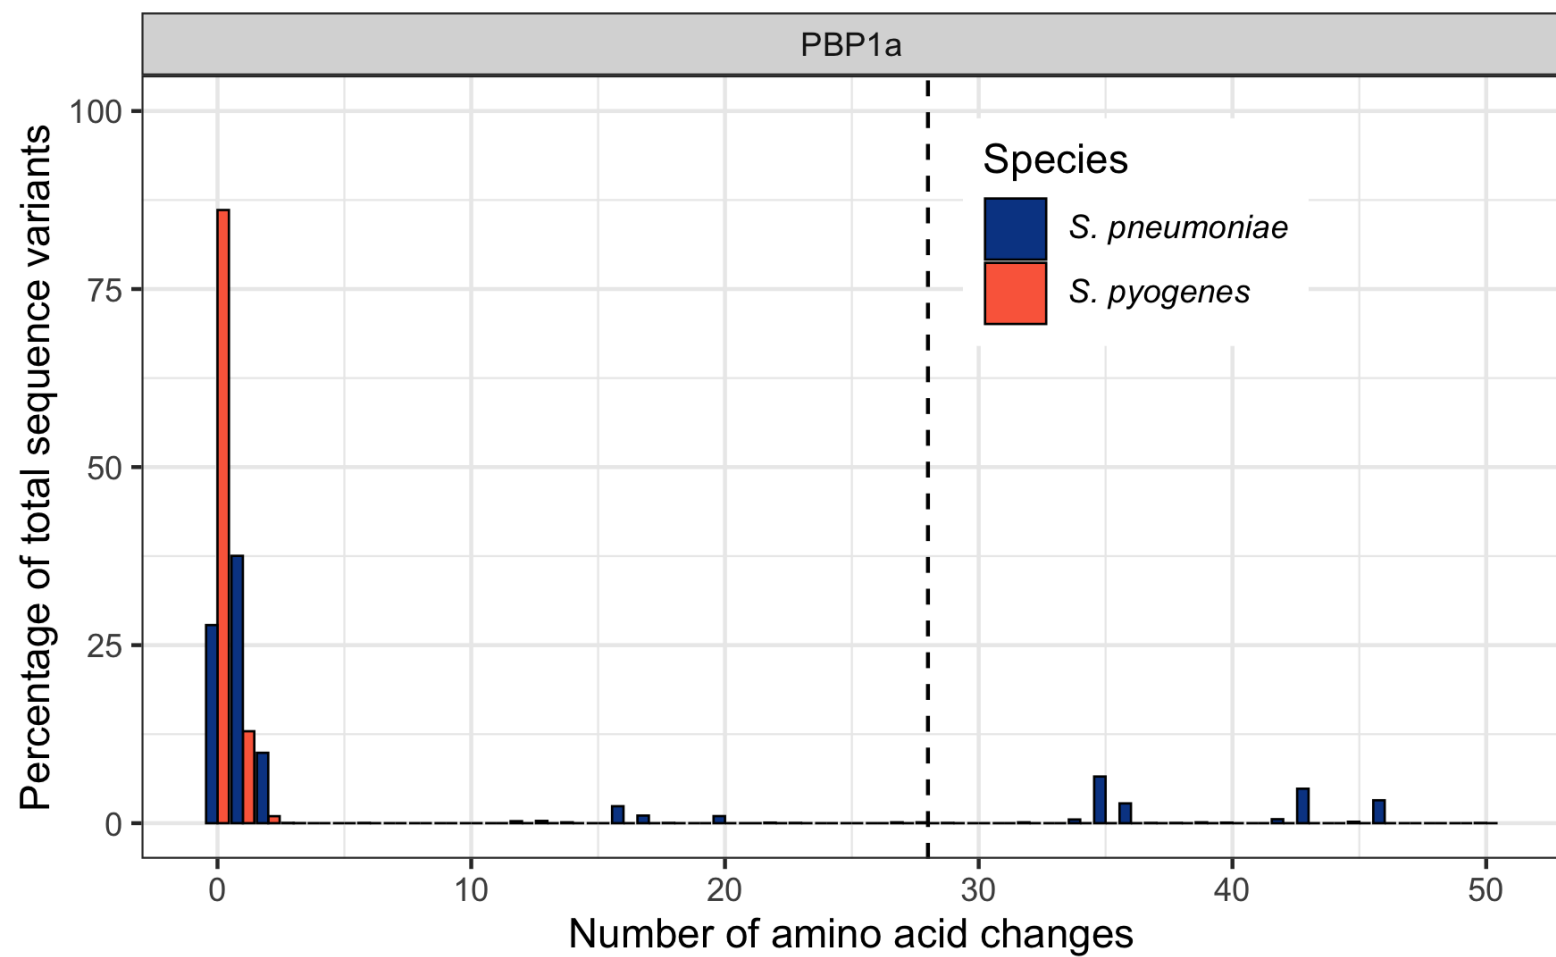

Source: https://biorxiv.org/content/biorxiv/early/2020/01/25/2020.01.24.919308.full-text.pdf
